# Supplementary material for: Ab initio study of Cd–thiol complexes: application to the modelling of the metallothionein active site
Source: Royal Society of Chemistry journal article supplement (doi:10.1039/b306790d), 2003-01-01
Supplement: b306790d.doc [file b306790d.doc]

*AB INITIO* STUDY OF CD-THIOL COMPLEXES: APPLICATION TO THE MODELLING OF THE METALLOTHIONEIN ACTIVE SITE

Mironel ENESCU#‡, Jean-Philippe RENAULT, Stanislas POMMERET,

Jean-Claude MIALOCQ and Serge PIN*

**Supplementary Materials**

**1. Computational method test**

We have examined the reliability of different computational methods in reproducing the experimental gas phase geometry of cadmium salts. Accurate experimental data were reported for CdCl2 and CdI2 molecules [1]. Experimental and computed CdX (X=Cl or I) distances are compared in Table 1 while the different basis sets are described in Table 2. One can see that the RHF-MP2 calculations with a moderately improved basis set (B2 also denoted as HW(p,d,f) in the main text) give interatomic distances very close to the experimental values. It is worth noting that the addition of the *f* polarization function (=0.539) on the Cd atom was essential to obtain the correct bond lengths. Further improvement of the basis set (basis set B3) has modest consequences on the computed values.

Accurate energy calculations require additional basis functions. A relevant test was performed on the dimer of CdI2 for which the dissociation free energy is known with good precision [2]. *Ab initio* calculations show that, in this dimer, each Cd atom is coordinatively bound to three I atoms in a planar structure. A dissociation free energy value of 67.7 kJ/mol, in good agreement with the experimental value of (70.66.7) kJ/mol was obtained with the B4 basis set which contains additional functions on the iodine atom: a *d* polarization and a *L* diffuse function. For these calculations the BSSE correction was 24.2 kJ/mol.

**2. Optimized geometry of cadmium-thiolate clusters**

Details of the calculated geometries of models A and C are presented in Tables 3 and 4.

**References**

(1) K. Ruedenberg, M. W. Schmidt, M. M. Gilbert and S. T. Elbert, Chemical Physics 1982, 71, 41-49.

(2) Handbook of Chemistry and Physics, ed. D. R. Linde, 81st-edition, CRC Press Boca Raton, London, New York, 2000.

(3) A. H. Robbins, D. E. McRee, M. Williamson, S. A. Collett, N. H. Xuong, W. F. Furey, B. C. Wang and C. D. Stout, J. Mol. Biol. 1991, 221, 1269-1293.

**Table captions**

Table 1. Experimental and calculated bond lengths in CdCl2 and CdI2 .

Table 2. Basis set notation.

aRef. 1.

Table 3. Comparison between the experimental Cd  S bond lengths in the Cd4Cys11 cluster and the calculated bond lengths of model systems A and C. <Cd  Sb> is the mean Cd  S bond length for bridging S atoms and <Cd  St> for terminal S atoms.

aRef. 3.

Table 4. Comparison between experimental SCdS angles in the Cd4Cys11 cluster and the calculated angles of model systems A and C.

aRef. 3.

**TABLE 1**

| Molecule | CdX bond length (Å) | | | | |
| --- | --- | --- | --- | --- | --- |
| Expt | RHF  B3 | RHF-MP2  B1 | RHF-MP2  B2 | RHF-MP2  B3 |
| CdCl2 | 2.24a | 2.28 | 2.29 | 2.23 | 2.24 |
| CdI2 | 2.56a | 2.62 | 2.62 | 2.57 | 2.56 |

**TABLE 2**

|  |  |
| --- | --- |
| **B1** | **HW plus 1p(H), 1d(X)** |
| **B2** | **HW plus 1p(H), 1d(X), 1f (Cd)** |
| **B3** | **HW plus 1p(H), 3d and 1f(X), 3f (Cd)** |
| **B4** | **HW plus 1p(H), 1L and 2d (X), 1f (Cd)** |

**TABLE 3**

|  | bond length (Å) | | | |
| --- | --- | --- | --- | --- |
| Exp.a | RHF  [Cd4(CH3S)11]3- | RHF  [Cd4(HS)11]3- | RHF-MP2  [Cd4(HS)11]3- |
| S1Cd1 | 2.49 | 2.54 | 2.54 | 2.47 |
| S2Cd1 | 2.50 | 2.63 | 2.65 | 2.55 |
| S3Cd1 | 2.44 | 2.64 | 2.66 | 2.52 |
| S4Cd1 | 2.51 | 2.66 | 2.65 | 2.55 |
| S2Cd2 | 2.57 | 2.68 | 2.69 | 2.57 |
| S5Cd2 | 2.50 | 2.57 | 2.57 | 2.50 |
| S6Cd2 | 2.50 | 2.58 | 2.57 | 2.49 |
| S7Cd2 | 2.50 | 2.68 | 2.71 | 2.58 |
| S3Cd3 | 2.52 | 2.65 | 2.66 | 2.52 |
| S7Cd3 | 2.60 | 2.65 | 2.64 | 2.54 |
| S8Cd3 | 2.48 | 2.56 | 2.56 | 2.48 |
| S9Cd3 | 2.51 | 2.64 | 2.64 | 2.54 |
| S4Cd4 | 2.45 | 2.67 | 2.70 | 2.57 |
| S9Cd4 | 2.62 | 2.69 | 2.72 | 2.58 |
| S10Cd4 | 2.47 | 2.57 | 2.57 | 2.49 |
| S11Cd4 | 2.55 | 2.57 | 2.55 | 2.48 |
| <Cd  St> | 2.50 | 2.57 | 2.56 | 2.49 |
| <Cd  Sb> | 2.53 | 2.66 | 2.67 | 2.55 |
| RMSD(d) | - | 0.12 | 0.13 | 0.05 |

TABLE 4

|  | SCdS angles (°) | | | |
| --- | --- | --- | --- | --- |
| Exp.a | RHF  [Cd4(CH3S)11]3- | RHF  [Cd4(HS)11]3- | RHF-MP2  [Cd4(HS)11]3- |
| S1Cd1S2 | 113.2 | 111.6 | 111.4 | 110.3 |
| S1Cd1S3 | 132.2 | 115.0 | 111.9 | 113.0 |
| S1Cd1S4 | 97.9 | 109.3 | 112.5 | 109.3 |
| S2Cd1S3 | 107.8 | 106.3 | 107.9 | 109.1 |
| S2Cd1S4 | 100.2 | 108.5 | 104.8 | 103.4 |
| S3Cd1S4 | 97.8 | 105.7 | 107.9 | 111.0 |
| S2Cd2S5 | 100.2 | 103.9 | 107.7 | 106.7 |
| S2Cd2S6 | 116.5 | 119.4 | 115.2 | 117.9 |
| S2Cd2S7 | 104.4 | 99.3 | 102.4 | 103.8 |
| S5Cd2S6 | 111.7 | 108.5 | 109.8 | 108.2 |
| S5Cd2S7 | 122.5 | 119.4 | 114.0 | 113.4 |
| S6Cd2S7 | 102.3 | 106.7 | 107.7 | 107.2 |
| S3Cd3S7 | 96.1 | 105.0 | 107.2 | 109.7 |
| S3Cd3S8 | 99.9 | 114.7 | 112.4 | 111.8 |
| S3Cd3S9 | 122.1 | 107.0 | 106.0 | 109.4 |
| S7Cd3S8 | 101.0 | 105.4 | 108.9 | 109.4 |
| S7Cd3S9 | 114.6 | 114.8 | 110.9 | 107.4 |
| S8Cd3S9 | 118.9 | 109.9 | 111.4 | 109.0 |
| S4Cd4S9 | 114.9 | 105.9 | 99.5 | 96.4 |
| S4Cd4S10 | 111.8 | 105.6 | 112.3 | 112.8 |
| S4Cd4S11 | 115.0 | 115.2 | 111.9 | 110.3 |
| S9Cd4S10 | 110.2 | 115.7 | 105.4 | 105.0 |
| S9Cd4S11 | 102.5 | 104.4 | 115.5 | 114.3 |
| S10Cd4S11 | 101.4 | 110.2 | 111.6 | 116.3 |
| RMSD() | - | 9.7 | 11.5 | 9.8 |
